# Supplementary material for: Combined Proteomics/Genomics Approach Reveals Proteomic Changes of Mature Virions as a Novel Poxvirus Adaptation Mechanism
Source: Viruses. 2017 Nov 10;9(11):337. doi: 10.3390/v9110337 (PMC5707544; doi:10.3390/v9110337)
Supplement: Supplementary file 1 [file viruses-09-00337-s001.pdf]

# Supplementary Materials

## Combined Proteomics/Genomics Approach Reveals Proteomic Changes of Mature Virions as a Novel Poxvirus Adaption Mechanism

Marica Grossegessse <sup>1</sup>, Joerg Doellinger <sup>1,2</sup>, Alona Tyshaieva <sup>1</sup>, Lars Schaade <sup>3</sup> and Andreas Nitsche <sup>1\*</sup>

Robert Koch Institute, Centre for Biological Threats and Special Pathogens (ZBS), 13353 Berlin, Germany

<sup>1</sup> Highly Pathogenic Viruses (ZBS 1); GrossegessseM@rki.de, TyshaievaA@rki.de, NitscheA@rki.de

<sup>2</sup> Proteomics and Spectroscopy (ZBS 6); DoellingerJ@rki.de

<sup>3</sup> Centre for Biological Threats and Special Pathogens (ZBS), SchaadeL@rki.de

\* Correspondence: NitscheA@rki.de; Phone: +49 (0)30 18754 2313

### Supplementary figures

Figure S1. Reference profiles of adaption-specific viral proteins.

Figure S2. CPE documentation during CPXV crust passaging.

Figure S3. Real-time cell analysis of crust and passages in HEp-2 and Rat-2 cells.

Figure S4. Coverage across CPXV genome.

Figure S5. Heatmap visualization of variant frequencies shared in HEp-2 and Rat-2 cells.

Figure S6. Linear correlation of virus protein intensities in IMV particles during passaging.

Figure S7. Principal component analysis of host CPXV IMV proteins during passaging.

Figure S8. Heatmap visualization of host proteins changing during passaging.

Figure S9. Plaque size during passaging.

### Supplementary tables

Table S1. Determination of the GE-to-PFU ratio.

Table S2. Parameters LC-MS/MS.

Table S3. Parameters MaxQuant.

Table S4. Overview of poxvirus reads and coverage.

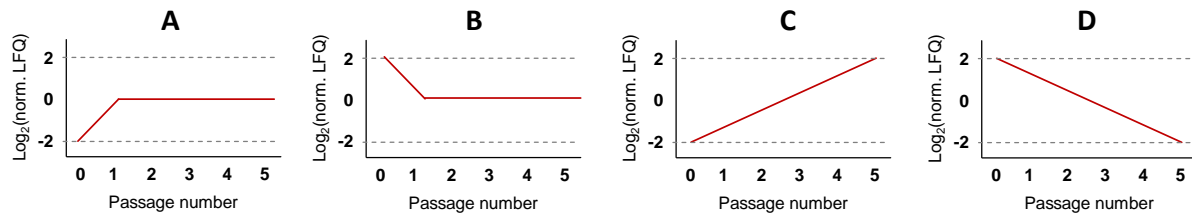

**Figure S1.** Reference profiles of adaption-specific viral proteins. (A,B) Reference profiles for viral proteins showing adaption upon host switch. (C,D) Reference profiles for viral proteins showing a continuous adaption during passaging.

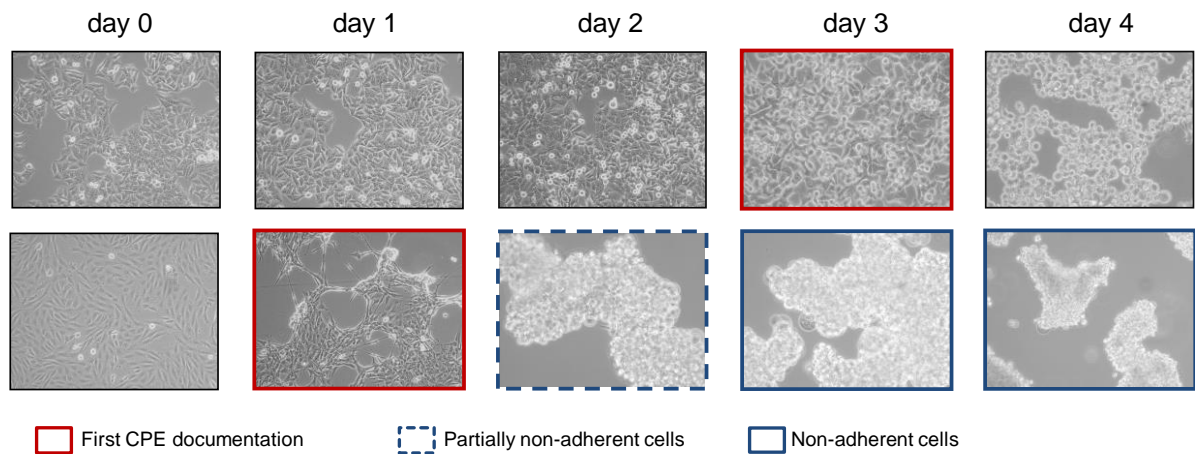

**Figure S2.** CPE documentation during CPXV crust passaging. HEp-2 and Rat-2 cells were infected with purified CPXV isolated from a rat crust (day 0) at an MOI of 0.1 and the cytopathic effect (CPE) was documented daily until harvesting (day 4).

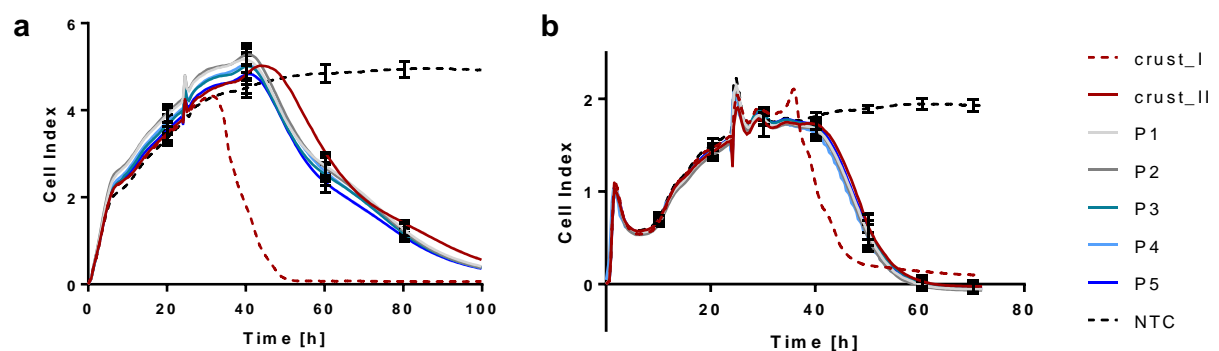

**Figure S3.** Real-time cell analysis of crust and passages in HEp-2 and Rat-2 cells. Repetition of the experiment. (a) HEp-2 cells; (b) Rat-2 cells. Shown are mean values  $\pm$  SD of biological triplicates of passages measured in technical quadruplicates ( $n=12$ ) or four (HEp-2) or five (Rat-2) technical replicates of the crust. One replicate of the crust in each cell line shows faster cell detachment (crust\_I).

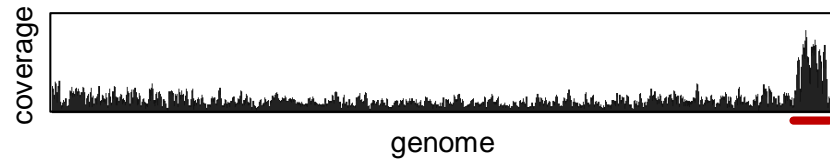

**Figure S4.** Coverage across CPXV genome. Duplicated genes display increased coverage (red bar).

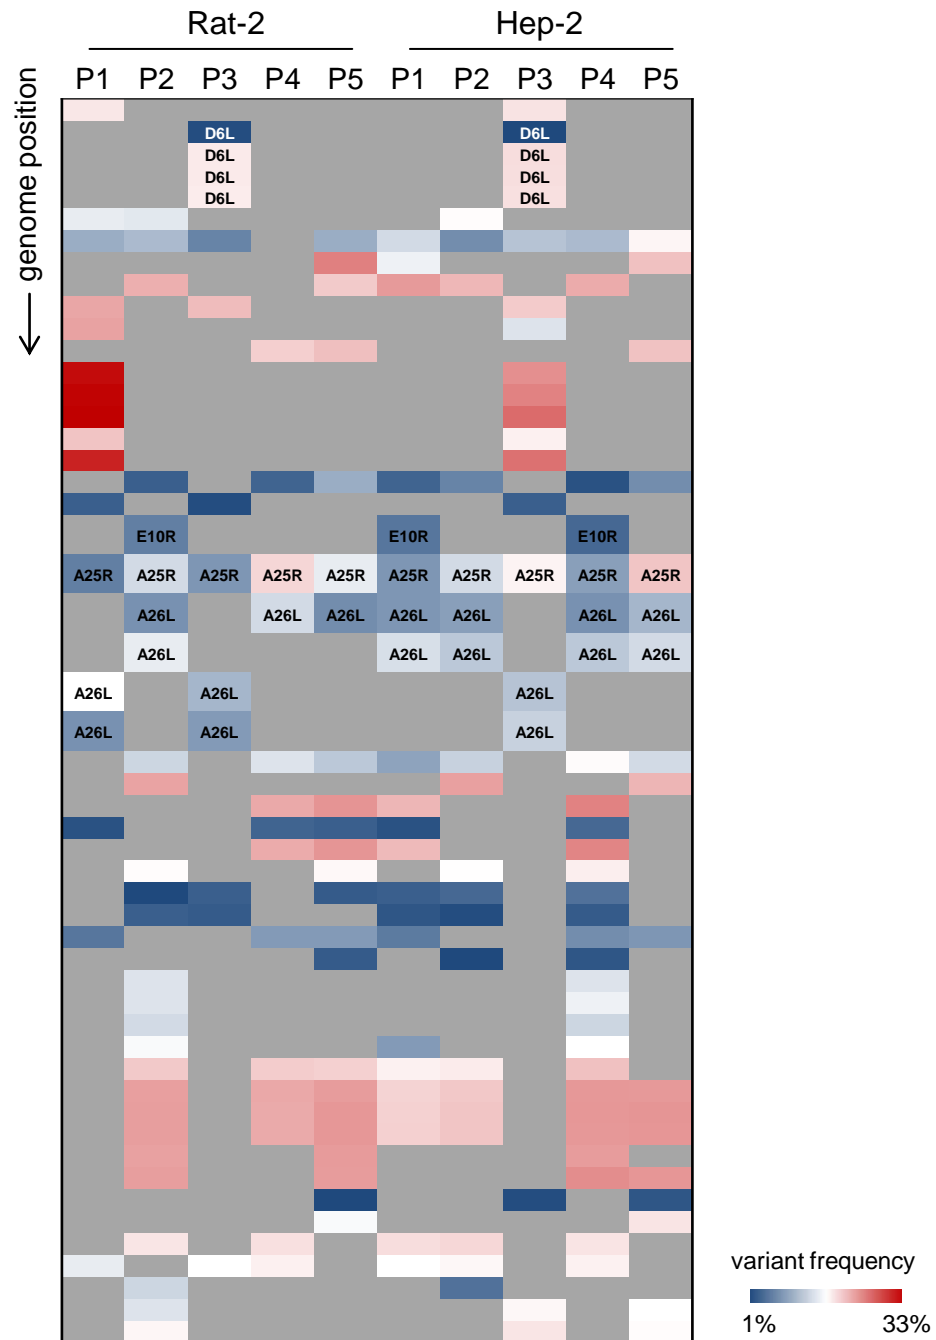

**Figure S5.** Heatmap visualization of variant frequencies shared in HEp-2 and Rat-2 cells. The frequency of 54 variants detected in both cell lines is shown according to the genome position. Frequencies are comparable, but

variants appeared mostly in different passages. If no gene name is shown variants localize in non-coding regions. Grey: variant not detected.

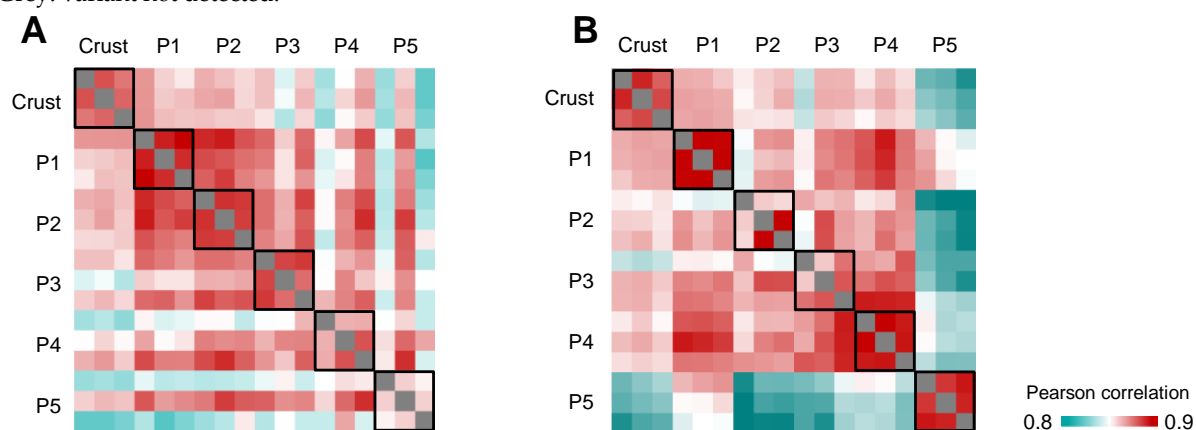

**Figure S6.** Linear correlation of virus protein intensities in IMV particles during passaging. Shown is the Pearson correlation of normalized valid viral LFQ intensities without missing values of crust and cell culture passaged virus (P1-P5) in (A) HEP-2 and (B) Rat-2 cells. P1-5=passages 1-5.

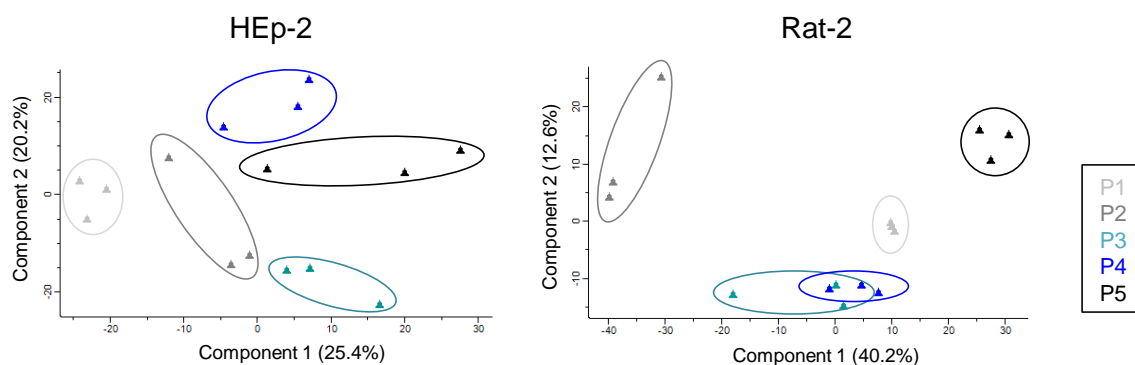

**Figure S7.** Principal component analysis of host CPXV IMV proteins during passaging. Normalized LFQ intensities of virus proteins without missing values were used for principal component analysis, revealing separability of host cell proteins associated with CPXV IMV particles during passaging in HEP-2 and Rat-2 cells. P1-P5=passage 1-5.

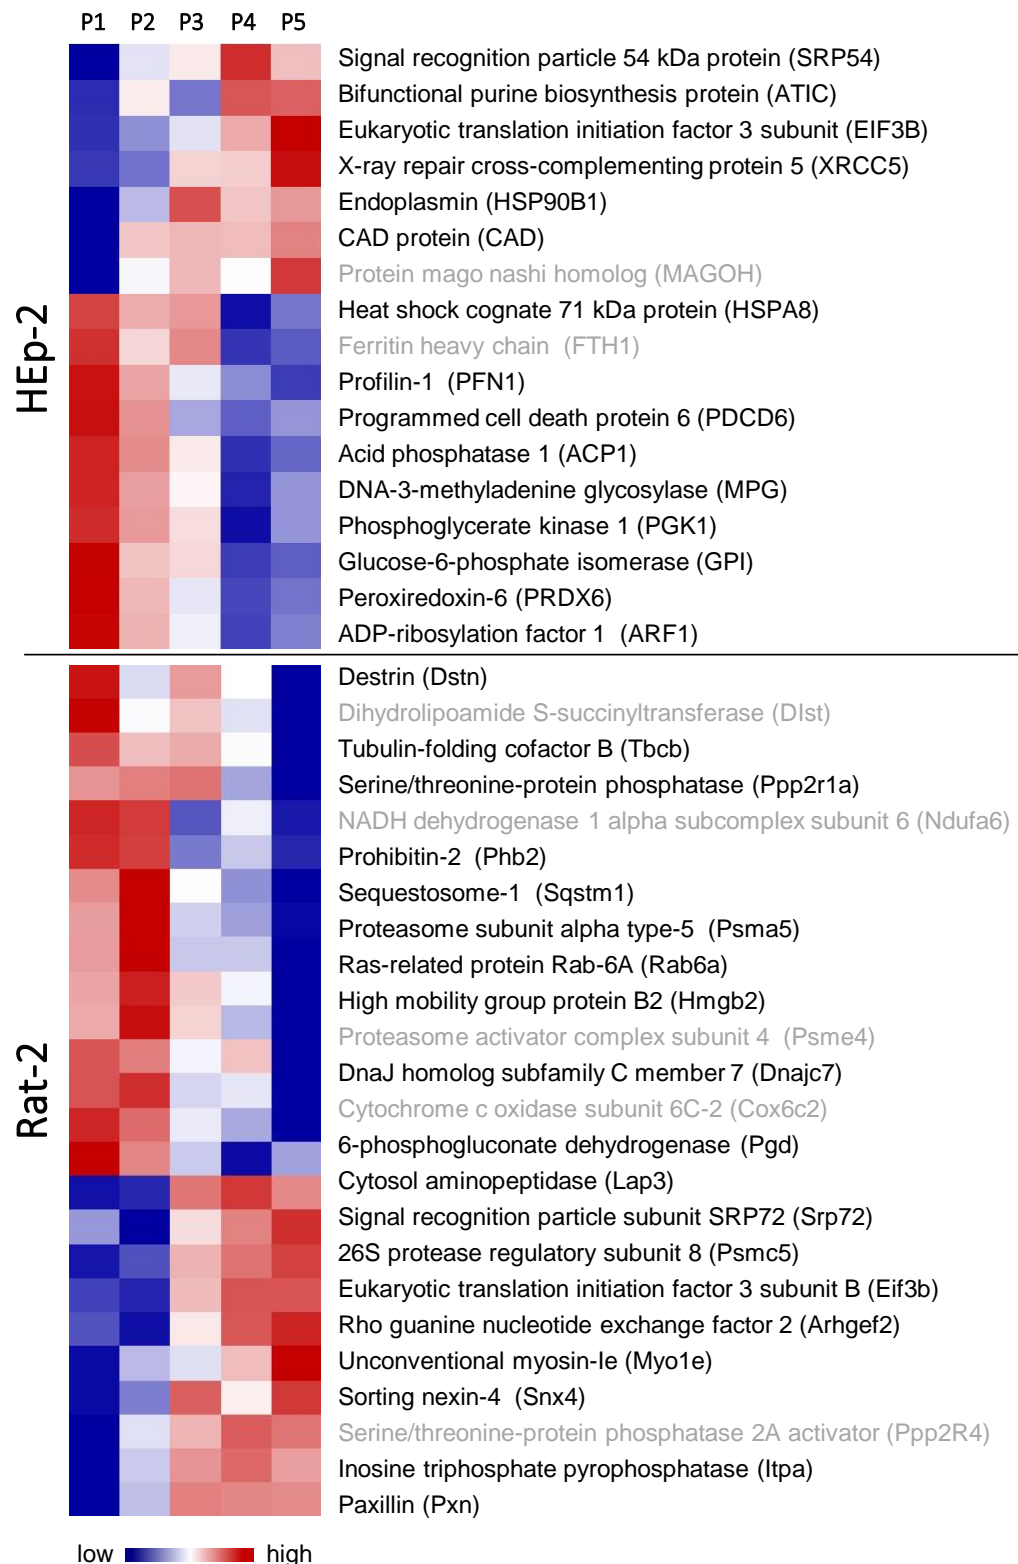

**Figure S8.** Heatmap visualization of host proteins changing during passaging. CPXV were passaged in HEp-2 and Rat-2 cells (P1-P5=passage 1-5) and analyzed for virion-associated host proteins. Shown are mean values of three biological replicates of z-score normalized protein intensities (ANOVA significant). Ribosomal proteins and histones were removed. Proteins written in black have been previously identified in highly pure OPV IMV preparations [1].

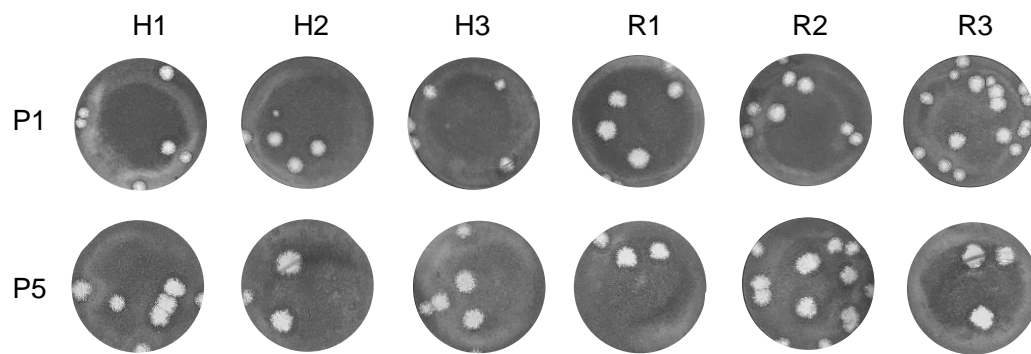

**Figure S9.** Plaque size during passaging. Letter indicate cell line (H=HEp-2, R=Rat-2) and replicate number (1-3); P1= first passage; P5= fifth passage.

**Table S1.** Determination of the GE-to-PFU ratio.

| Sample             | GE       | PFU      | GE/PFU ratio | Mean      | SD       |
|--------------------|----------|----------|--------------|-----------|----------|
| HEp-2, replicate 1 | 2.48E+10 | 3.50E+08 | 70.8         | <b>82</b> | <b>9</b> |
| HEp-2, replicate 2 | 2.61E+10 | 3.33E+08 | 78.3         |           |          |
| HEp-2, replicate 3 | 2.47E+10 | 2.83E+08 | 87.2         |           |          |
| HEp-2, replicate 4 | 3.62E+10 | 4.00E+08 | 90.6         |           |          |
| Rat-2, replicate 1 | 2.50E+09 | 1.75E+08 | 14.3         | <b>17</b> | <b>8</b> |
| Rat-2, replicate 2 | 3.28E+09 | 1.17E+08 | 28.2         |           |          |
| Rat-2, replicate 3 | 2.09E+09 | 2.17E+08 | 9.6          |           |          |
| Rat-2, replicate 4 | 4.00E+09 | 2.33E+08 | 17.1         |           |          |

**Table S2.** Parameters LC-MS/MS.

| nLC separation                             |                                                  |
|--------------------------------------------|--------------------------------------------------|
| Analytical column                          | Reprosil-Pur 120 C18-AQ, 2.4 µm, 300 mm x 75 µm  |
| Emitter tip                                | Stainless steel emitter, O.D. 150 µm, I.D. 30 µm |
| Solvent A                                  | 0.1 % FA, 3 % DMSO in H <sub>2</sub> O           |
| Solvent B                                  | 0.1 % FA, 3 % DMSO in ACN                        |
| Flow rate                                  | 225 nl/min                                       |
| Gradient                                   | 0-29 % B in 4 h                                  |
| Sample load                                | 2 µg in 4 µl in 0.1 % FA                         |
| LTQ Orbitrap                               |                                                  |
| Top N iontrap                              | 7                                                |
| Resolution orbitrap                        | 30000                                            |
| Scan rate ion trap                         | normal                                           |
| Ion charge                                 | +2, +3                                           |
| AGC MS target value                        | 1.00E+06                                         |
| AGC MS <sup>2</sup> target value           | 5.00E+03                                         |
| MS <sup>2</sup> threshold                  | 5.00E+02                                         |
| Mass range                                 | 400-1400 m/z                                     |
| Normalized collision energy for CID        | 35 %                                             |
| Max. ion accumulation time MS              | 500 ms                                           |
| Max. ion accumulation time MS <sup>2</sup> | 100 ms                                           |
| Exclusion duration                         | 120 s                                            |
| Spray voltage                              | 2.0 kV                                           |
| Capillary temperature                      | 275 °C                                           |

**Table S3.** Parameters MaxQuant.

|                                                 |                                                                          |
|-------------------------------------------------|--------------------------------------------------------------------------|
| RAW files                                       | 3× crust<br>(technical replicates)<br>15× HEp-2 P1-P5<br>15× Rat-2 P1-P5 |
| Databases                                       | Human, rat, CPXV_crust Hei, contaminant                                  |
| Digestion mode, enzyme                          | Specific, trypsin/P                                                      |
| Max missed cleavages                            | 2                                                                        |
| Variable modifications                          | Oxidation (M), acetylation (protein N-term), diGly(K)                    |
| Fixed modification                              | Carbamidomethyl (C)                                                      |
| Mass tolerance parent ions                      | 6 ppm                                                                    |
| Mass tolerance fragment ions                    | 0.5 Da                                                                   |
| Peptide FDR                                     | 0.05                                                                     |
| Protein FDR                                     | 0.01                                                                     |
| Site decoy fraction                             | 0.01                                                                     |
| LFQ min. ratio count                            | 1                                                                        |
| Match between runs                              | ON                                                                       |
| Match time window [min]                         | 2.5                                                                      |
| Alignment time window [min]                     | 20                                                                       |
| Peptides for quantification                     | Unique + razor                                                           |
| Use only unmodified peptides for quantification | OFF                                                                      |

**Table S4.** Overview of poxvirus reads and coverage.

| Sample <sup>a</sup> | Pox reads <sup>b</sup> | Coverage <sup>c</sup> | Genome size | Sample <sup>a</sup> | Pox reads <sup>b</sup> | Coverage <sup>c</sup> | Genome size |
|---------------------|------------------------|-----------------------|-------------|---------------------|------------------------|-----------------------|-------------|
| HP1                 | 3.27E+06               | 2432.6                | 216,329     | RP1                 | 1.74E+06               | 1338.4                | 209,458     |
| HP2                 | 4.28E+06               | 3596.3                | 216,478     | RP2                 | 6.80E+06               | 5624.3                | 216,476     |
| HP3                 | 3.15E+06               | 3233.1                | 216,230     | RP3                 | 6.94E+06               | 6114.5                | 216,481     |
| HP4                 | 3.01E+06               | 3014.3                | 216,626     | RP4                 | 8.54E+05               | 722.1                 | 216,479     |
| HP5                 | 1.13E+06               | 891.3                 | 216,476     | RP5                 | 7.97E+05               | 793.4                 | 216,899     |
| Mean                | 2.97E+06               | 2633.5                |             | Mean                | 3.43E+06               | 2918.54               |             |
| crust               | 1.30E+06               | 1290.3                | 216,458     |                     |                        |                       |             |

<sup>a</sup>H=HEp-2; R=Rat-2; P=passage; <sup>b</sup>Trimmed reads after quality control; <sup>c</sup>Mean across viral genome
